# Supplementary material for: Biological and metabolic effects of IACS-010759, an OxPhos inhibitor, on chronic lymphocytic leukemia cells
Source: PubMed Central journal article supplement (PMC5982765; doi:10.18632/oncotarget.25166), 2018-05-18
Supplement: oncotarget-09-24980-s001.pdf [file oncotarget-09-24980-s001.pdf]

## Biological and metabolic effects of IACS-010759, an OxPhos inhibitor, on chronic lymphocytic leukemia cells

### SUPPLEMENTARY MATERIALS

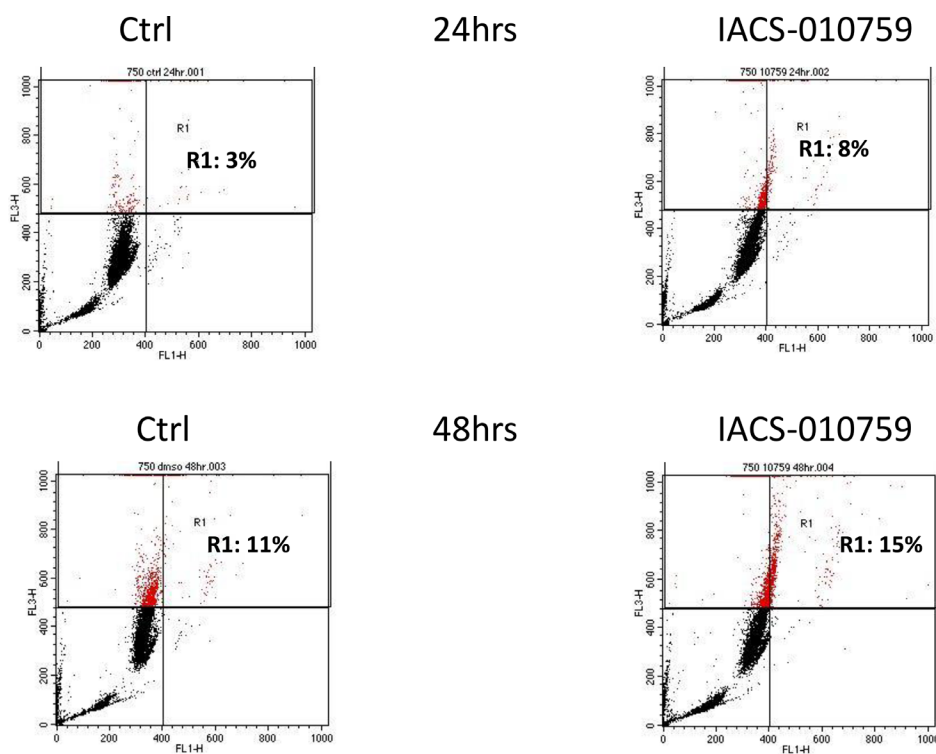

**Supplementary Figure 1: Induction of autophagy after treatment with IACS-010759.** CLL cells ( $10^6$ ) from patient #750 were either untreated or treated with IACS-010759 for 24 and 48 h, stained with acridine orange, and analyzed by flow cytometry. R1, % of acridine orange positive CLL cells.

**Supplementary Table 1: Patient characteristics.** See Supplementary\_Table\_1
